# Supplementary material for: Nuclear Entry of CRTC1 as Druggable Target of Acquired Pigmentary Disorder
Source: PubMed Central journal article supplement — Theranostics. 2019 Jan 21;9(3):646–60. doi: 10.7150/thno.30276 (PMC6376463; doi:10.7150/thno.30276), 2019-01-21
Supplement: thnov09p0646s1.pdf [file thnov09p0646s1.pdf]

## Supplementary Material

Nuclear entry of CRTCL as druggable target of acquired pigmentary disorder

Cheong-Yong Yun<sup>1,\*</sup>, Seung Deok Hong<sup>1,\*</sup>, Young Hee Lee<sup>2</sup>, Jiyeon Lee<sup>1</sup>, Da-Eun Jung<sup>1</sup>, Ga Hyun Kim<sup>1</sup>, Song-Hee Kim<sup>1</sup>, Jae-Kyung Jung<sup>1</sup>, Ki Ho Kim<sup>3</sup>, Heesoon Lee<sup>1</sup>, Jin Tae Hong<sup>1</sup>, Sang-Bae Han<sup>1</sup>, Youngsoo Kim<sup>1</sup>✉

<sup>1</sup>College of Pharmacy, Chungbuk National University, Cheongju 28160, Korea; <sup>2</sup>Samjin Pharmaceutical Company, Seoul 04054, Korea; <sup>3</sup>Kihobio Company, Cheongju 28160, Korea

---

### Contents

- Tables S1 to S3
- Figures S1 to S12

**Table S1. Nucleotide sequence of RT-PCR primer**

| Target                    | Nucleotide sequence (amplicon)                                                              |
|---------------------------|---------------------------------------------------------------------------------------------|
| $\beta$ -Catenin (B16-F0) | Forward 5'-TGCAGATCTTGGACTGGAC-3'<br>Reverse 5'-CATGCTCCATCATAGGGTCCA-3' (133 bp)           |
| CRTC1 (B16-F0)            | Forward 5'-TCCCCAACATCATCCTCAC-3'<br>Reverse 5'-GGTCAATCTTCAGCTCGTC-3' (138 bp)             |
| KPNA1 (MNT1)              | Forward 5'-GTGATCTCCTCACGGTCATG-3'<br>Reverse 5'-CATAGGAGCCTCACACTG-3' (314 bp)             |
| KPNA2 (MNT1)              | Forward 5'-TCTGCTTGGGCACTCACT-3'<br>Reverse 5'-TGCAGGAGCCGAACTAAG-3' (365 bp)               |
| KPNA4 (MNT1)              | Forward 5'-ATGCTTCAAGTGATAACCAAGG-3'<br>Reverse 5' CAAGACAATGGACTAAAATGG-3' (135 bp)        |
| MITF-M (B16-F0)           | Forward 5'-CTAGAATACAGTCACTACCAG-3'<br>Reverse 5'-CCATCAAGCCCAAATTTCTT-3' (404 bp)          |
| MITF-M (guinea pig)       | Forward 5'-GGTGCCGATGGAAGTCCTTA-3'<br>Reverse 5'-CCATCAAGCCCAGAATTTCTT-3' (384 bp)          |
| MITF-M (HEM, MNT1)        | Forward 5'-TCTACCGTCTCTCACTGGATTGG-3'<br>Reverse 5'-GCTTTACCTGCTGCCGTTGG-3' (142 bp)        |
| SOX10 (B16-F0)            | Forward 5'-CAGACTGGAGGAGAGGTCGG-3'<br>Reverse 5'-GGTCTTGTTCTCGGCCATG-3' (122 bp)            |
| SOX10 (MNT1)              | Forward 5'- AGTACCCGCACCTGCACA-3'<br>Reverse 5'- GAAGGGGCGCTTGTCCT-3' (86 bp)               |
| TYR (B16-F0)              | Forward 5'-CATTTTTGATTTGAGTGTCT-3'<br>Reverse 5'-TGTGGTAGTCGTCTTTGTCC-3' (1,211 bp)         |
| TYR (guinea pig)          | Forward 5'-CATCTTTGATTTGAGTGTC-3'<br>Reverse 5'-CTTTTACAAATGGCTTTGAT-3' (1,231 bp)          |
| $\beta$ -Actin (B16-F0)   | Forward 5'-TGGAATCCTGTGGCATCCATGAAAC-3'<br>Reverse 5'-TAAAACGCAGCTCAGTAACAGTCCG-3' (349 bp) |

$\beta$ -Actin (B16-F0)

Forward 5'-TGCAGATCTTGGACTGGAC-3'

Reverse 5'-CATGCTCCATCATAGGGTCCA-3' (134 bp)

$\beta$ -Actin (HEM, MNT1)

Forward 5'-GAGACCTTCAACACCCCAGCC-3'

Reverse 5'-GGCCATCTCTTGCTCGAAGTC-3' (312 bp)

---

**Table S2. Nucleotide sequence of PCR primer in ChIP assay**

| Target                        | Nucleotide sequence (amplicon) |                                      | ChIP                   |
|-------------------------------|--------------------------------|--------------------------------------|------------------------|
| CREB-responsive Element (CRE) | Forward                        | 5'-TGGGGACTTGGCCTTGATCT-3'           | Anti-CRTC1             |
|                               | Reverse                        | 5'-ATATCAGTTTCCCTGCTGGCT-3' (114 bp) |                        |
| LEF1-responsive element       | Forward                        | 5'-TGGGGACTTGGCCTTGATCT-3'           | Anti- $\beta$ -catenin |
|                               | Reverse                        | 5'-ATATCAGTTTCCCTGCTGGCT-3' (114 bp) |                        |
| SOX10-responsive element      | Forward                        | 5'-TCTGAAGAGGGCATCCAGCT-3'           | Anti-SOX10             |
|                               | Reverse                        | 5'-AGATCAAGGCCAAGTCCCCA-3' (102 bp)  |                        |

Quantitative PCR was designed to encompass CREB-, LEF- or SOX10-responsive *cis*-acting element at the MITF-M promoter in mice. CRTC1 and  $\beta$ -catenin assemble to CREB and LEF1 on the DNA motifs, respectively.

**Table S3. Nucleotide sequence of siRNA**

---

| Target         | Nucleotide sequence        |
|----------------|----------------------------|
| CRTC1 (B16-F0) | 5'-UGGACAGAGUAUAUCGUGA-3'  |
| KPNA1 (MNT1)   | 5'-AAUGUGCUUCCUGGUUGCUG-3' |
| KPNA2 (MNT1)   | 5'-CAGUGUCCGAGACUUGGUUA-3' |
| KPNA4 (MNT1)   | 5'-CAACUUAUGUCGCCACAAA-3'  |

---

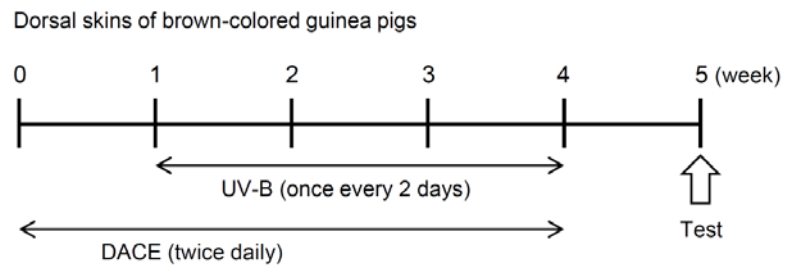

**Figure S1. Experimental protocol of UV-B-induced skin hyperpigmentation.** Dorsal skins of guinea pigs were topically treated with DACE (0.03-0.1%) in a twice-daily regimen for four weeks, and irradiated with UV-B ( $350 \text{ mJ/cm}^2$ ) once every two days for three weeks. Skin hyperpigmentation was measured at one week after the end of the UV-B radiation.

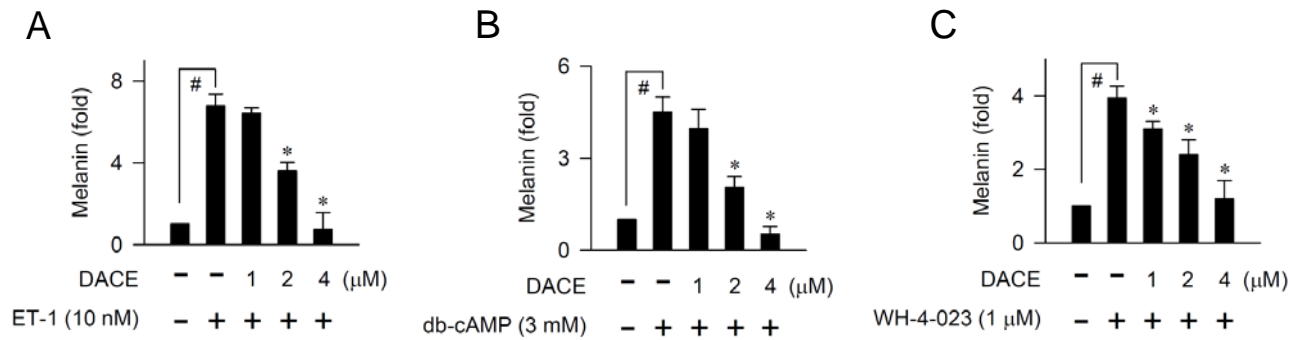

**Figure S2. Effect of DACE on ET-, db-cAMP- or WH-4-023-induced melanin production.** B16-F0 cells were stimulated with ET-1 (A), db-cAMP (B) or WH-4-023 (C) for 72 h in the presence of DACE. Melanin pigments were quantified by measuring absorbance values at 405 nm, and are represented as relative fold change. Data are mean  $\pm$  SEM (n = 5). #*P* < 0.05 vs. medium alone. \**P* < 0.05 vs. ET-1, db-cAMP or WH-4-023 alone.

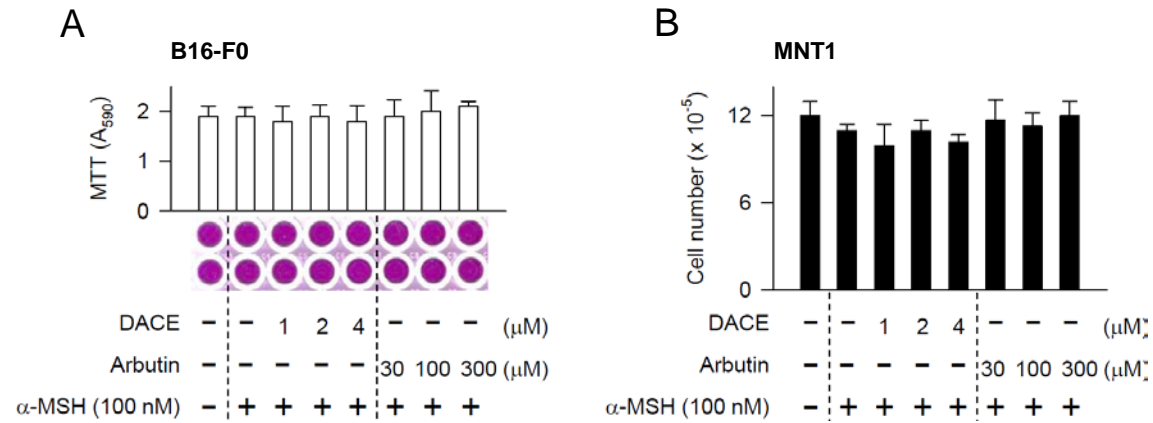

**Figure S3. Effect of DACE on cell viability.** (A) B16-F0 cells were incubated with DACE for 72 h in the presence of  $\alpha$ -MSH. The cells were reacted with 0.5 mg/ml MTT for 1 h. Formazan crystals were dissolved in 99% DMSO, and measured absorbance values at 590 nm ( $A_{590}$ ). (B) MNT1 cells were incubated with DACE for 72 h in the presence of  $\alpha$ -MSH. Cell numbers were counted after exclusion with trypan blue dye. Data are mean  $\pm$  SEM (n = 3)



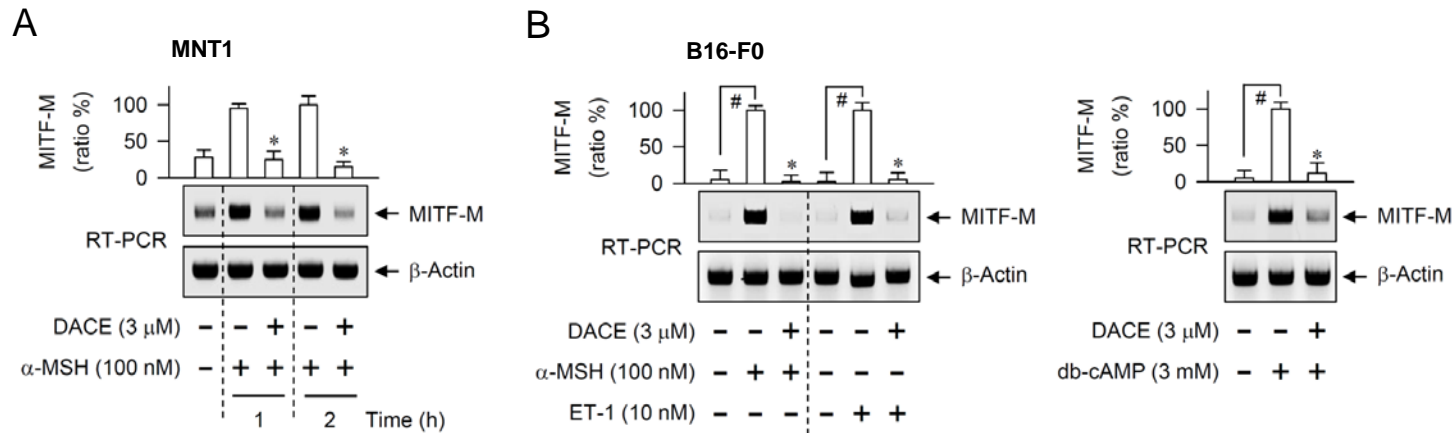

**Figure S4. Effect of DACE on  $\alpha$ -MSH-, ET-1- or db-cAMP-induced MITF-M transcription.** (A) MNT1 cells were pretreated with DACE for 2 h and stimulated with  $\alpha$ -MSH for indicated time points in the presence of DACE. (B) B16-F0 cells were pretreated with DACE for 2 h and stimulated with  $\alpha$ -MSH, ET-1 or db-cAMP for another 2 h in the presence of DACE. Total RNAs were subjected to RT-PCR analysis of MITF-M with the internal control  $\beta$ -actin. Data are mean  $\pm$  SEM (n = 3). # $P$  < 0.05 vs. medium alone. \* $P$  < 0.05 vs.  $\alpha$ -MSH, ET-1 or db-cAMP alone.

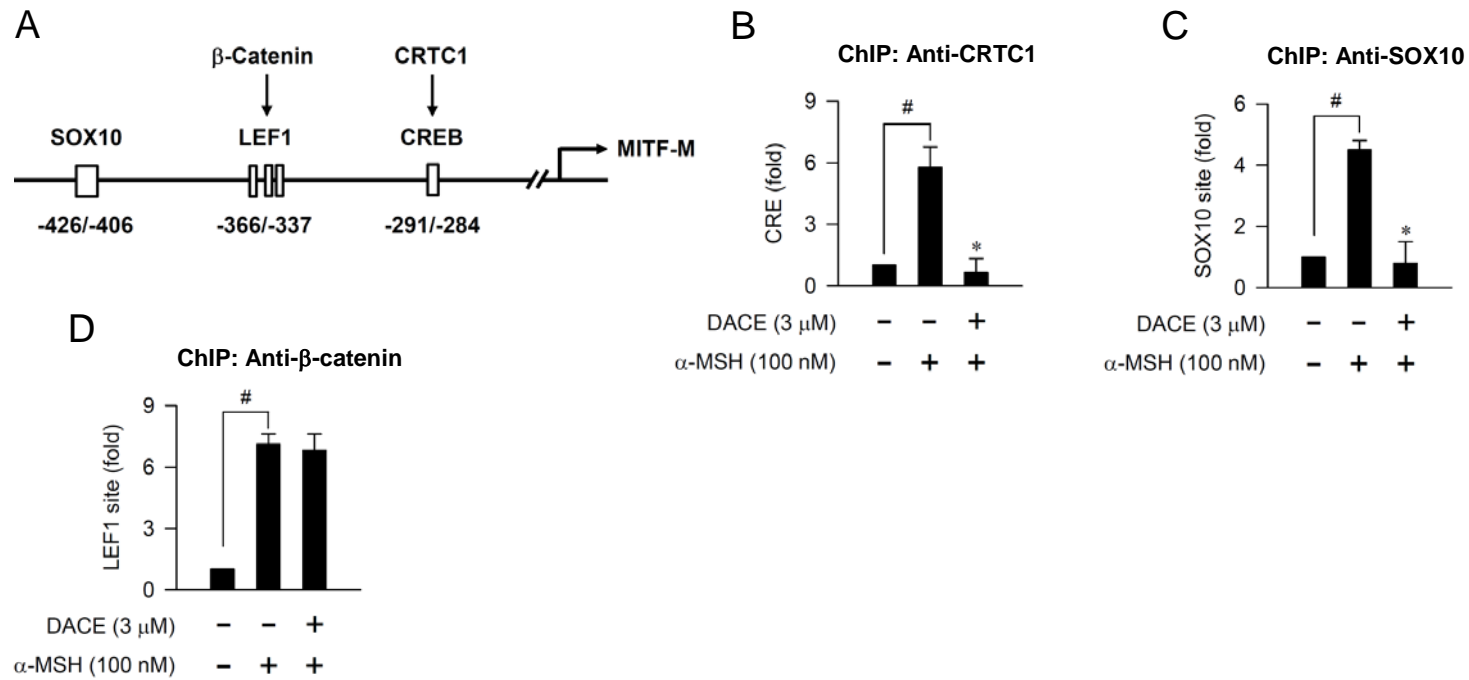

**Figure S5. Effect of DACE on  $\alpha$ -MSH-induced transcriptional ability of CREB/CRTC1 heterodimer, SOX10 or LEF1/ $\beta$ -catenin heterodimer.** Schematic representation of CREB-, LEF1- or SOX10-responsive *cis*-acting elements at the MITF-M promoter in mice. CRTC1 or  $\beta$ -catenin assembles to CREB or LEF1 on the DNA motif. B16-F0 cells were pretreated with DACE for 2 h, stimulated with  $\alpha$ -MSH for 20 min (B, D) or 1 h (C) in the presence of DACE, and subjected to chromatin immunoprecipitation (ChIP) analysis. After cross-linked between DNA and proteins, chromatin fragments were precipitated with anti-CRTC1 (B), anti-SOX10 (C) or anti- $\beta$ -catenin antibody (D). Input and precipitated DNAs were subjected to quantitative PCR encompassing CREB-responsive CRE motif (B), SOX10- (C) or LEF1-responsive *cis*-acting element (D) at the MITF-M promoter. Data are mean  $\pm$  SEM (n = 3). #*P* < 0.05 vs. medium alone. \**P* < 0.05 vs.  $\alpha$ -MSH alone.

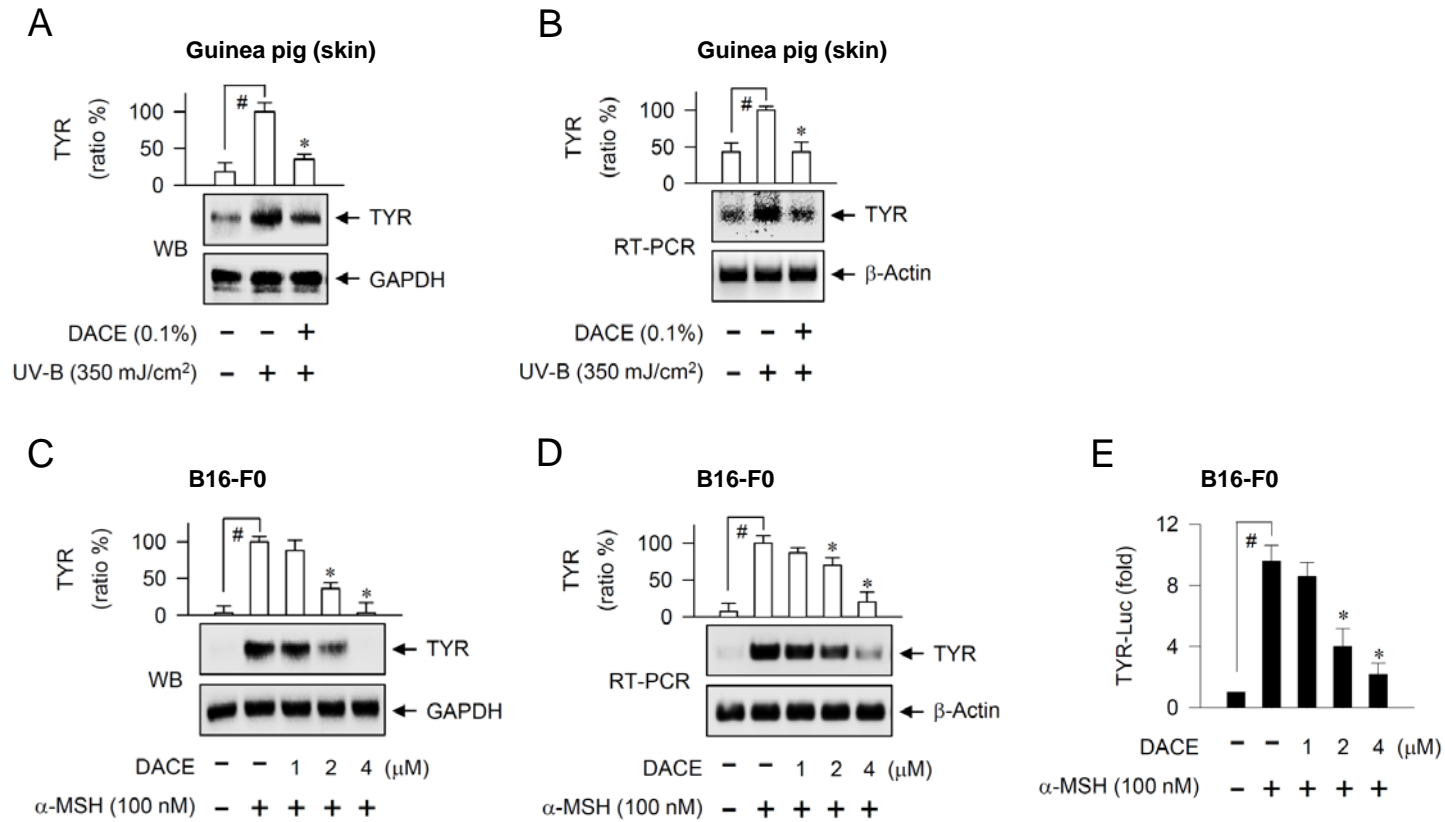

**Figure S6. Effect of DACE on TYR expression.** (A, B) Dorsal skins of guinea pigs were exposed to UV-B radiation (350 mJ/cm<sup>2</sup>) and treated topically with DACE according to the protocol in Figure S1. Skin tissues were biopsied. B16-F0 cells were stimulated with  $\alpha$ -MSH for 48 h (C) or 18 h (D) in the presence of DACE. (A, C) Protein extracts were subjected to Western blot analysis (WB) with anti-TYR or anti-GAPDH antibody. (B, D) Total RNAs were subjected to RT-PCR analysis of TYR with the internal control  $\beta$ -actin. (E) B16-F0 cells were transfected with TYR-Luc reporter construct in combination with *Renilla* control vector. The transfected cells were pretreated with DACE for 2 h and stimulated

with  $\alpha$ -MSH for 20 h in the presence of DACE. Firefly luciferase activity, reporting promoter activity of TYR gene, is represented as relative fold change after normalizing to *Renilla* activity as a reference of transfection efficiency. Data are mean  $\pm$  SEM (n = 3). <sup>#</sup>*P* < 0.05 vs. normal skin (A, B) or medium alone (C-E). \**P* < 0.05 vs. UV-B alone (A, B) or  $\alpha$ -MSH alone (C-E).

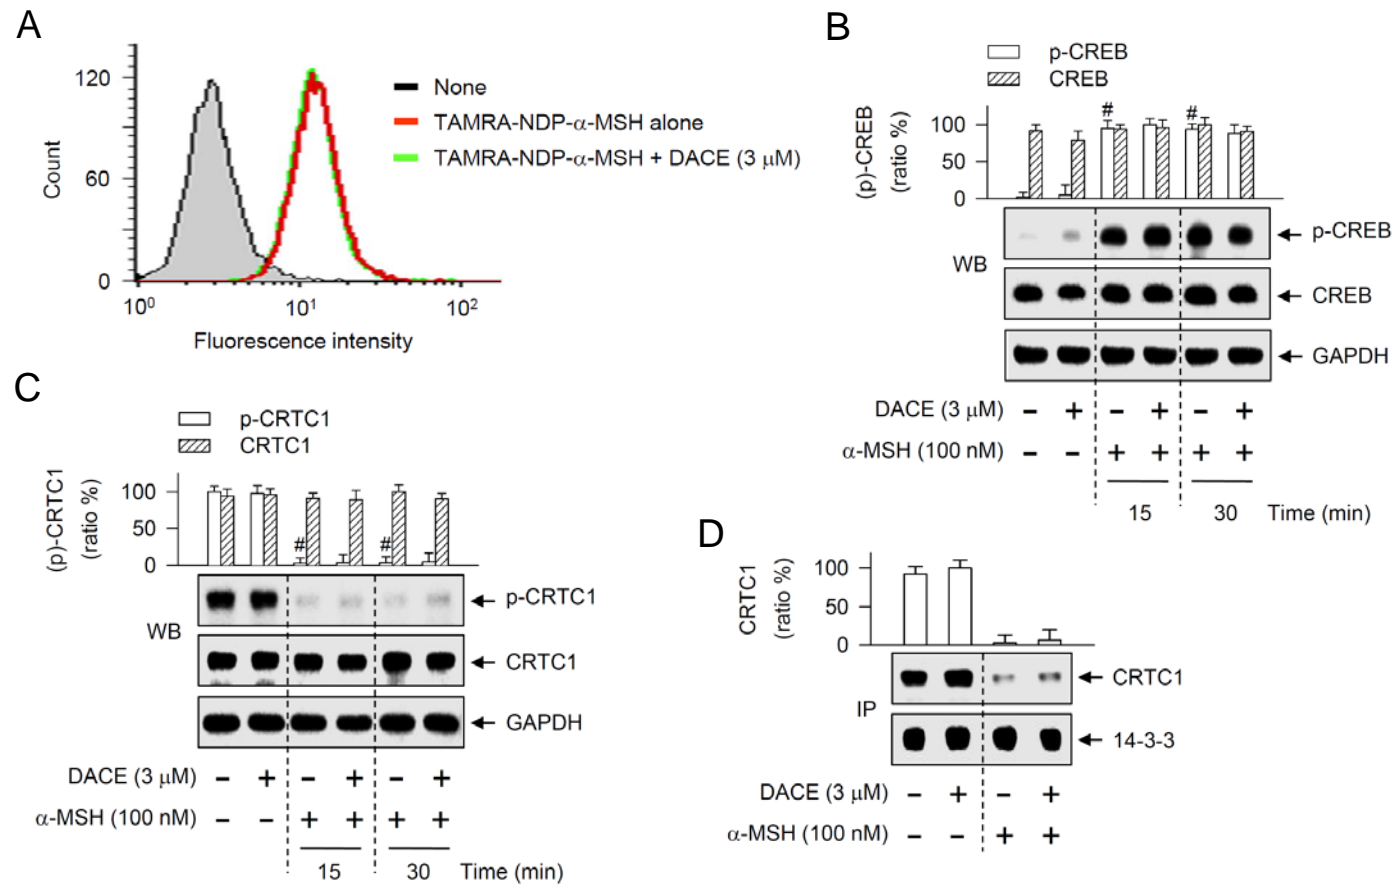

**Figure S7. Effect of DACE on the  $\alpha$ -MSH-binding to receptor, the phosphorylation of CREB, the dephosphorylation of CRTC1 or the tethering of CRTC1 by 14-3-3 proteins.** (A) B16-F0 cells were incubated with 500 nM TAMRA-NDP- $\alpha$ -MSH, a fluorescent  $\alpha$ -MSH probe, for 30 min in the presence of DACE, and subjected to flow cytometric analysis. B16-F0 cells were pretreated with DACE for 2 h and stimulated with  $\alpha$ -MSH for indicated time points (B, C) or 15 min (D) in the presence of DACE. Cell extracts were subjected to Western blot analysis (WB) with

anti-p-CREB, anti-CREB or anti-GAPDH antibody (B) and with anti-p-CRTC1, anti-CRTC1 or anti-GAPDH antibody (C). (D) For immunoprecipitation (IP), cell extracts were precipitated with the pan antibody against 14-3-3 proteins, and probed with anti-CRTC1 or anti-14-3-3 antibody to detect the co-precipitates. Data are mean  $\pm$  SEM (n =3). <sup>#</sup>*P* < 0.05 vs. medium alone.

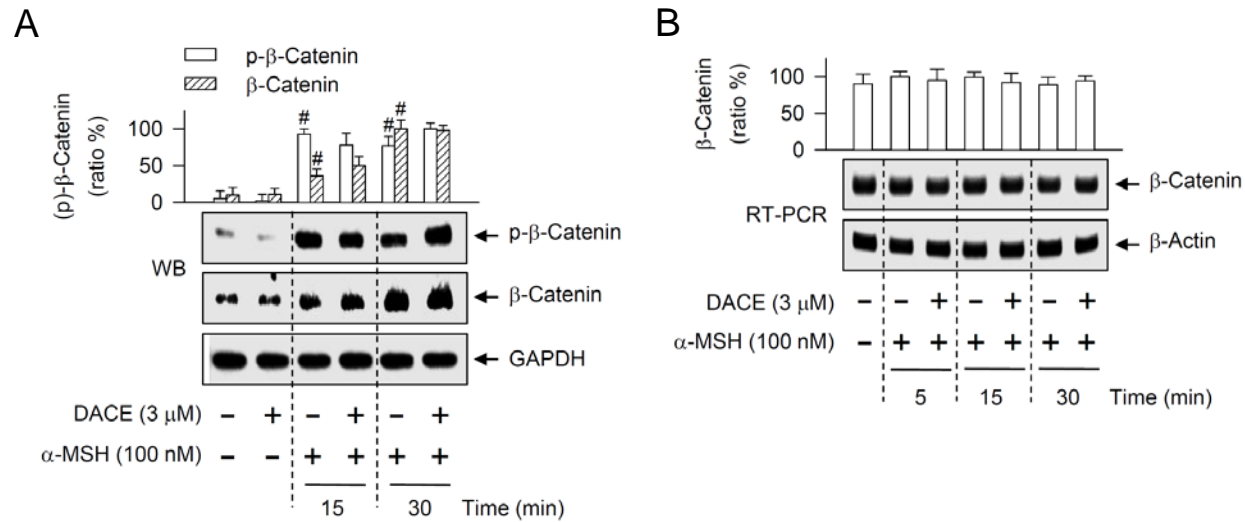

**Figure S8. Effect of DACE on the phosphorylation or expression of β-catenin.** B16-F0 cells were pretreated with DACE for 2 h and stimulated with α-MSH for indicated time points in the presence of DACE. (A) Cell extracts were subjected to Western blot analysis (WB) with anti-p-β-catenin, anti-β-catenin or anti-GAPDH antibody. (B) Total RNAs were subjected to RT-PCR analysis of β-catenin with the internal control β-actin, Data are mean ± SEM (n = 3). <sup>#</sup>*P* < 0.05 vs. medium alone.

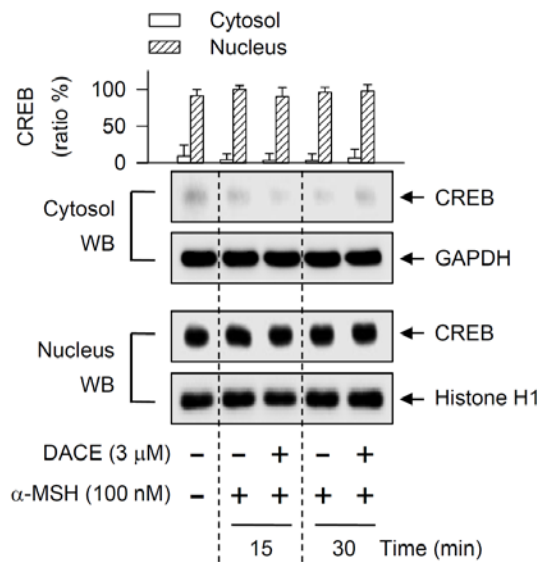

**Figure S9. Effect of DACE on the nuclear retention of CREB.** B16-F0 cells were pretreated with DACE for 2 h and stimulated with  $\alpha$ -MSH for indicated time points in the presence of DACE. Cell extracts were partitioned between the cytosol and the nucleus, and subjected to Western blot analysis (WB) with anti-CREB, anti-GAPDH or anti-histone H1 antibody. Data are mean  $\pm$  SEM (n = 3).



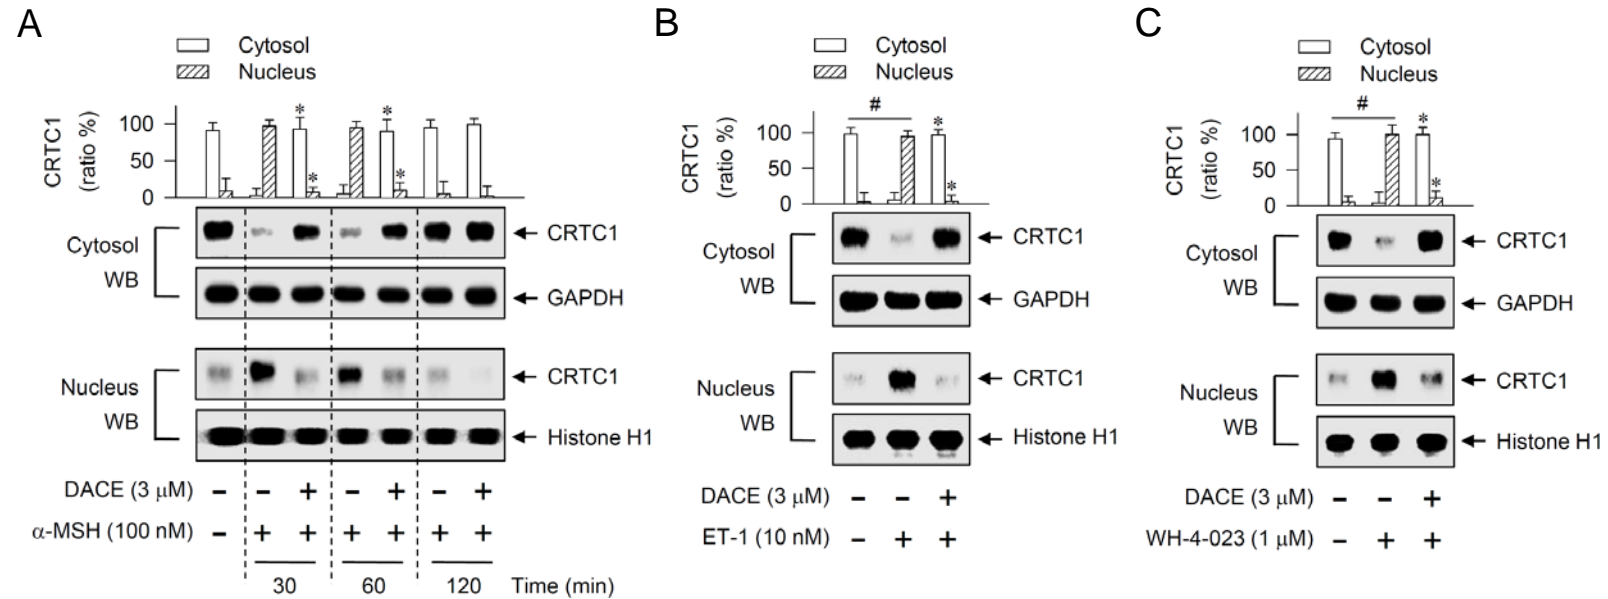

**Figure S10. Effect of DACE on  $\alpha$ -MSH-, ET-1- or WH-4-023-induced nuclear import of CRTC1.** (A) B16-F0 cells were pretreated with DACE for 2 h and stimulated with  $\alpha$ -MSH for indicated time points (A), ET-1 for 20 min (B) or WH-4-023 for 20 min (C) in the presence of DACE. Cell extracts were partitioned between the cytosol and the nucleus, and subjected to Western blot analysis (WB) with anti-CRTC1, anti-GAPDH or anti-histone H1 antibody. Data are mean  $\pm$  SEM (n = 3). \* $P$  < 0.05 vs.  $\alpha$ -MSH, ET-1 or WH-4-023 alone. # $P$  < 0.05 vs. medium alone.

(Figure S11)

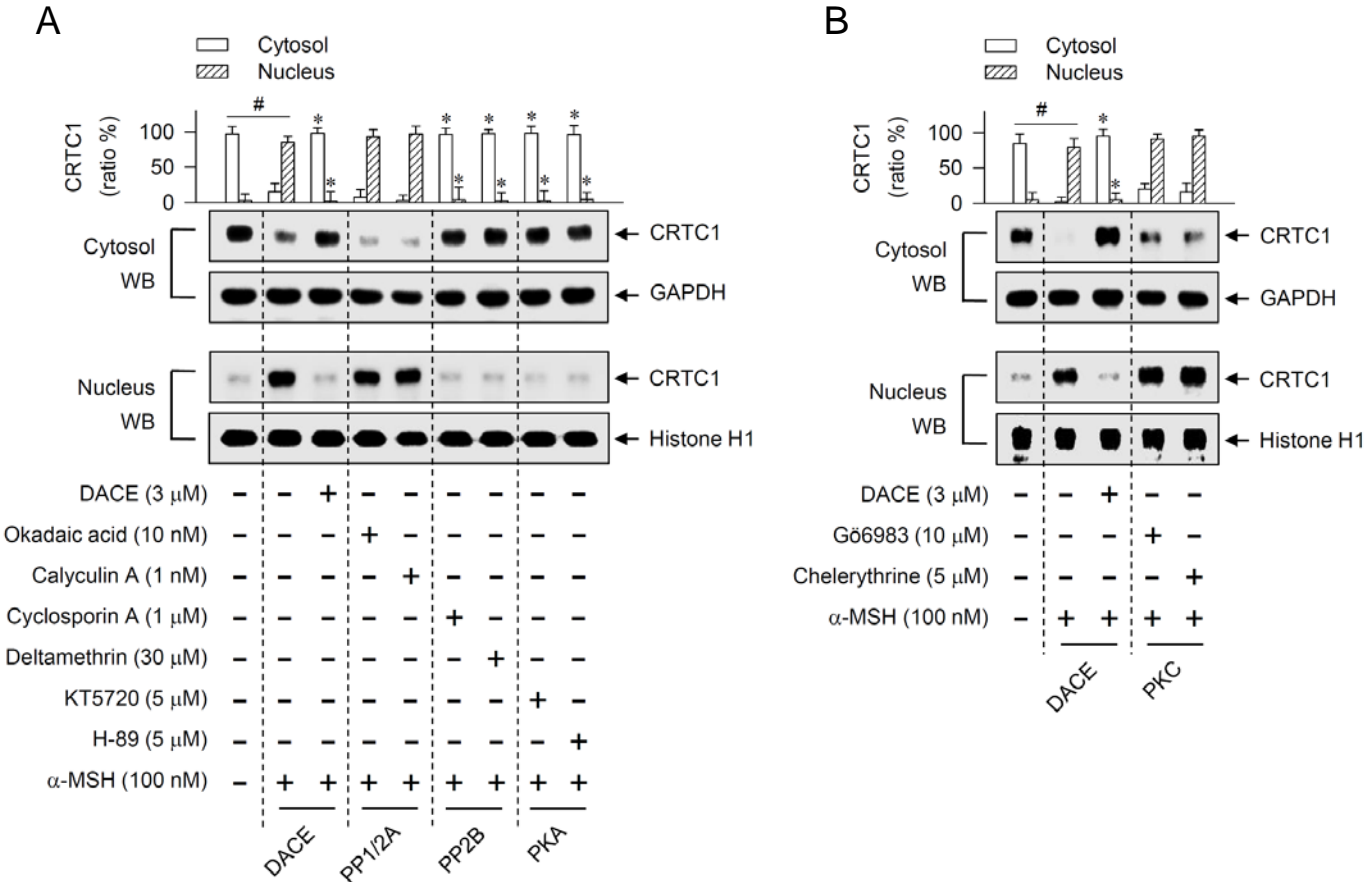

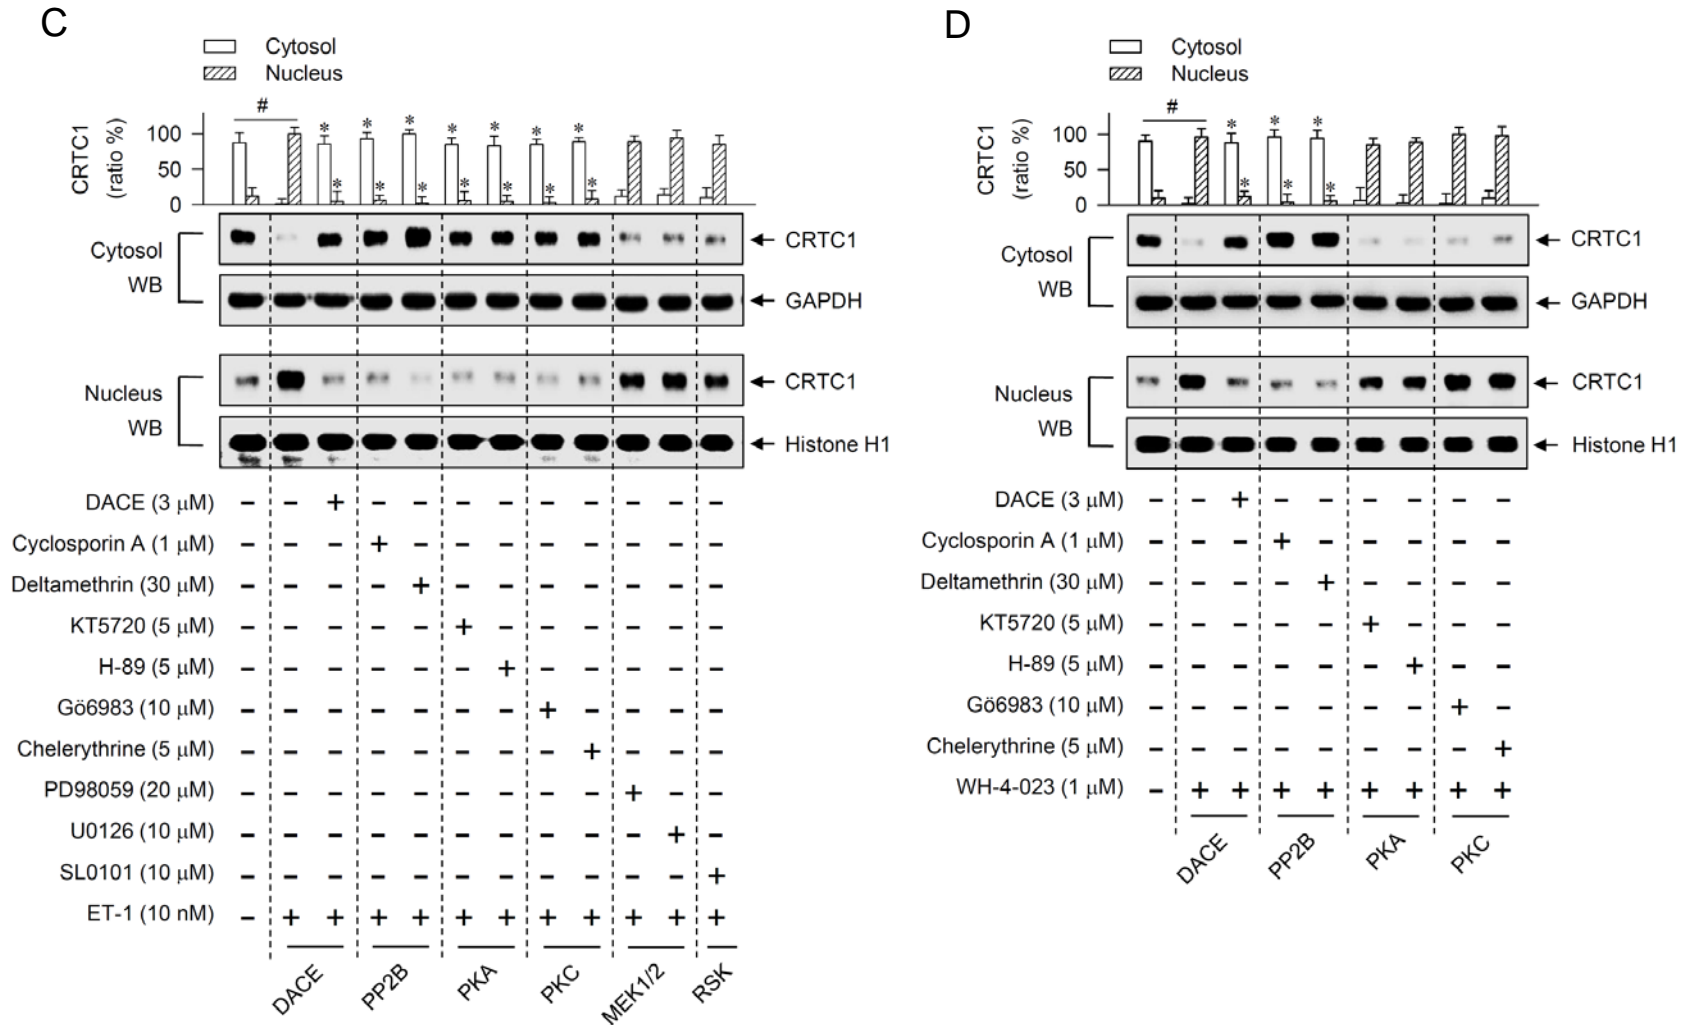

**Figure S11. Effects of phosphatase inhibitor and kinase inhibitor on the nuclear import of CRTC1.** B16-F0 cells were pretreated with each inhibitor for 2 h and stimulated with  $\alpha$ -MSH (A, B), ET-1 (C) or WH-4-023 (D) for 20 min in the presence of each inhibitor. Cell extracts were

partitioned between the cytosol and the nucleus, and subjected to Western blot analysis (WB) with anti-CRTC1, anti-GAPDH or anti-histone H1 antibody. Data are mean  $\pm$  SEM (n = 3). <sup>#</sup>*P* < 0.05 vs. medium alone. \**P* < 0.05 vs.  $\alpha$ -MSH, ET-1 or WH-4-023 alone.

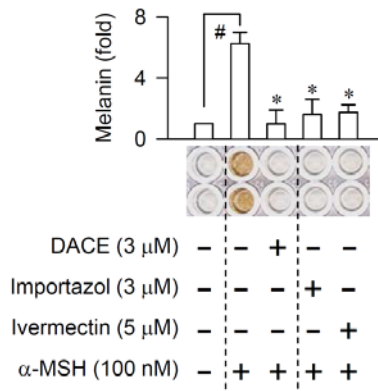

**Figure S12. Effects of importazol and ivermectin on melanin production.** B16-F0 cells were stimulated with  $\alpha$ -MSH for 72 h in the presence of importazol or ivermectin. Melanin pigments were quantified by measuring absorbance values at 405 nm, and are represented as relative fold change. Data are mean  $\pm$  SEM (n = 3). # $P$  < 0.05 vs. medium alone. \* $P$  < 0.05 vs.  $\alpha$ -MSH alone.
